# Supplementary material for: Prevalence, risk factors, and management practices of primary dysmenorrhea among young females
Source: PubMed Central journal article supplement (PMC8576974; doi:10.1186/s12905-021-01532-w), 2021-11-08
Supplement: 12905_2021_1532_MOESM1_ESM.pdf [file 12905_2021_1532_MOESM1_ESM.pdf]

*Additional File 1. Informed Consent and Questionnaire Form*

***Prevalence, Risk Factors, and Management Practices of Primary Dysmenorrhea among Young Females***

**Authors:** Samar Karout, Lama Soubra, Deema Rahme, Lina Karout, Hani M J Khojah, and Rania Itani\*

<sup>1</sup> Pharmacy Practice Department, Faculty of Pharmacy, Beirut Arab University, P.O.Box: 11-5020, Riad El Solh, 1107 2809, Beirut, Lebanon.

<sup>2</sup> Pharmacology and Therapeutics Department, Faculty of Pharmacy, Beirut Arab University, P.O.Box: 11-5020, Riad El Solh, 1107 2809, Beirut, Lebanon.

<sup>3</sup> Department of Radiology, American University of Beirut Medical Center, P.O.Box: 11-0236, Riad El-Solh, 1107 2020, Beirut, Lebanon.

<sup>4</sup> Department of Clinical and Hospital Pharmacy, College of Pharmacy, Taibah University, Madinah, Kingdom of Saudi Arabia.

\***Corresponding author:** Rania Itani  
[r.itani@bau.edu.lb](mailto:r.itani@bau.edu.lb)

**Dear Respondent,**

The following questionnaire is intended to investigate the prevalence of dysmenorrhea among Lebanese university students and assess the management practices. **Dysmenorrhea, painful periods**, is one of the most common **health disorders** among **females**. Dysmenorrhea is usually accompanied with **lower abdominal pain** and **discomfort** during **menstruation**. It negatively affects the patient's quality of life and may limit daily physical activities.

This questionnaire will take around 10 minutes to be completed. Your participation is important for us.

Thank you for your time and cooperation in completing this survey.

## ***Informed Consent***

Your participation in this survey is **voluntary**, you have the right not to participate or withdraw at any time.

This survey is intended for research purposes and your medical data will be kept confidential.

I voluntarily agree to participate in this research study. I have had the purpose and nature of the study explained to me in writing and I have had the opportunity to ask questions about the study. I understand that even if I agree to participate now, I can withdraw at any time or refuse to answer any question without any consequences of any kind and I understand that all the information I provide for this study will be treated confidentially.

**Signature of the participant:** -----

**Date:** -----

## Questionnaire Form

### Prevalence, Risk Factors, and Management Practices of Primary Dysmenorrhea among Young Females

Instructions: Please tick (✓) for the answer and fill in the blanks when necessary

| Sociodemographic Information                                          |                                                                                                                                                                                                                                                                                                                                                                                                                                                                                                                                                                                                        |
|-----------------------------------------------------------------------|--------------------------------------------------------------------------------------------------------------------------------------------------------------------------------------------------------------------------------------------------------------------------------------------------------------------------------------------------------------------------------------------------------------------------------------------------------------------------------------------------------------------------------------------------------------------------------------------------------|
| 1. University:                                                        | _____                                                                                                                                                                                                                                                                                                                                                                                                                                                                                                                                                                                                  |
| 2. Faculty:                                                           | _____                                                                                                                                                                                                                                                                                                                                                                                                                                                                                                                                                                                                  |
| 3. Specify your academic year:                                        | <input type="checkbox"/> 1 <sup>st</sup> <input type="checkbox"/> 2 <sup>nd</sup> <input type="checkbox"/> 3 <sup>rd</sup> <input type="checkbox"/> 4 <sup>th</sup> <input type="checkbox"/> 5 <sup>th</sup> <input type="checkbox"/> 6 <sup>th</sup> <input type="checkbox"/> Post-graduate                                                                                                                                                                                                                                                                                                           |
| 4. Age:                                                               | _____ years                                                                                                                                                                                                                                                                                                                                                                                                                                                                                                                                                                                            |
| 5. Weight:                                                            | _____ kg                                                                                                                                                                                                                                                                                                                                                                                                                                                                                                                                                                                               |
| 6. Height:                                                            | _____ cm                                                                                                                                                                                                                                                                                                                                                                                                                                                                                                                                                                                               |
| 7. Marital status:                                                    | <input type="checkbox"/> Single/Engaged <input type="checkbox"/> Married <input type="checkbox"/> Divorced                                                                                                                                                                                                                                                                                                                                                                                                                                                                                             |
| 8. Do you have children:                                              | <input type="checkbox"/> No <input type="checkbox"/> Yes                                                                                                                                                                                                                                                                                                                                                                                                                                                                                                                                               |
| 9. Do you have any drug allergies?                                    | <input type="checkbox"/> No <input type="checkbox"/> Yes, specify: _____                                                                                                                                                                                                                                                                                                                                                                                                                                                                                                                               |
| Lifestyle Habits                                                      |                                                                                                                                                                                                                                                                                                                                                                                                                                                                                                                                                                                                        |
| 10. Do you smoke?                                                     | <input type="checkbox"/> No <input type="checkbox"/> Yes <input type="checkbox"/> Ex-smoker<br>If YES: <input type="checkbox"/> Cigarette <input type="checkbox"/> Hookah (Nargila)<br>Number of Cigarettes per day: ____ OR # of hookah session per day: ____                                                                                                                                                                                                                                                                                                                                         |
| 11. Do you drink alcohol?                                             | <input type="checkbox"/> No <input type="checkbox"/> Yes, occasionally <input type="checkbox"/> Yes, on daily bases                                                                                                                                                                                                                                                                                                                                                                                                                                                                                    |
| 12. Do you exercise regularly?                                        | <input type="checkbox"/> No, I don't exercise <input type="checkbox"/> Yes, <b>once</b> weekly <input type="checkbox"/> Yes, <b>twice</b> weekly<br><input type="checkbox"/> Yes, <b>three</b> time weekly <input type="checkbox"/> Yes, <b>four</b> times weekly <input type="checkbox"/> Yes, <b>five</b> times weekly<br><input type="checkbox"/> Yes, <b>six</b> times weekly <input type="checkbox"/> Yes, <b>every day</b><br><br>If YES, specify the <b>type of exercise</b> you do: _____<br>specify the <b>time</b> you spend on exercising <b>per day</b> : _____ minutes   OR   _____ hours |
| 13. During the <b>last year</b> , did you <b>try to lose weight</b> ? | <input type="checkbox"/> No <input type="checkbox"/> Yes                                                                                                                                                                                                                                                                                                                                                                                                                                                                                                                                               |
| Medical and Medication History                                        |                                                                                                                                                                                                                                                                                                                                                                                                                                                                                                                                                                                                        |
| 14. Do you have any chronic medical disease(s)?                       | <input type="checkbox"/> No <input type="checkbox"/> Yes, specify the condition: _____                                                                                                                                                                                                                                                                                                                                                                                                                                                                                                                 |
| 15. Do you have any gynecological (women-related) disease(s)?         | <input type="checkbox"/> No <input type="checkbox"/> Yes, specify the condition: _____                                                                                                                                                                                                                                                                                                                                                                                                                                                                                                                 |
| 16. Do you have any gastrointestinal ulcers/bleeding?                 | <input type="checkbox"/> No <input type="checkbox"/> Yes, specify the condition: _____                                                                                                                                                                                                                                                                                                                                                                                                                                                                                                                 |
| 17. Do you take any prescribed medication(s) on daily basis?          | <input type="checkbox"/> No <input type="checkbox"/> Yes, specify: _____                                                                                                                                                                                                                                                                                                                                                                                                                                                                                                                               |
| 18. Do you take any hormonal contraceptive pills?                     | <input type="checkbox"/> No <input type="checkbox"/> Yes, specify: _____                                                                                                                                                                                                                                                                                                                                                                                                                                                                                                                               |

If **YES**, What is the reason behind using those contraceptive pills?  
\_\_\_\_\_

19. Do you take any over the counter (OTC) [Non-prescription] medication(s)?  No  Yes, specify:  
\_\_\_\_\_

20. Do you take any herbal, supplements or gym products?  No  Yes, specify:

21. Does your mother or sister(s) have history of painful periods?  No  Yes

### Menstrual Pattern

22. At what age did you have your **first** menstrual cycle? \_\_\_\_\_ years

23. Do you have a **regular period** on **monthly basis**?  No  Yes

24. How many **days** are there between your **first day of one period** and the **first day of the next period (average menstrual cycle length)**? \_\_\_\_\_ days

25. How long does your period **last** (duration of menstrual bleeding)? \_\_\_\_\_ days

26. How is the **blood flow** during your period (menses)?

- Light (<1 sanitary pad soaked in 3 hours)
- Moderate (>1 sanitary pad soaked in three hours)
- Heavy (>1 fully soaked sanitary pad every two hours)

27. Do you have **painful periods** characterized as **lower abdominal cramps** during menstruation?

- No**, not at all
- Yes**, in some periods (**once every 3 months**)
- Yes**, in few periods (**once every 6 months**)
- Yes**, in **all periods**

**If your answer is No, not at all on the previous question, you have finished the survey.**

**Thanks for your time.**

**If your answer is YES, please continue the survey**



### Management Seeking Practices

**37. Who have you consulted** about your painful periods?

**Healthcare providers:**     Physician     Pharmacist     Nurse

**Others:**

Mother     Sister     Friend     School/university  
instructor

Published media     Internet resources

Other(s), specify: \_\_\_\_\_

**38. If you did NOT consult a health care provider, please specify the reason for NOT to:**

Painful periods is a **normal physiological** cycle that occurs to females

Painful periods can be **tolerated**

Requesting a consult about painful periods is **embarrassing**

**Lack of time**

**Less availability** of female healthcare providers

Health care provider's consult is **not beneficial** in pain relief

Other(s),specify: \_\_\_\_\_

### Lifestyle Measures for Pain Management

**39. Do you follow any lifestyle measures** to control your painful periods?     No     Yes

If **YES**, choose: (you can tick one or more of the following options)

**Relaxing therapies:**

Massage     Yoga     Exercise     Rest     Sleep     Distraction by social media

Hot bath     Heating pad/Warm compress

**Liquid intake:**     Increase **water** intake     Drink **black** tea     Drink **green** tea

Drink **chamomile** tea     Drink **ginger** tea     Drink **anise** Tea

Drink **cinnamon** Tea

Others, specify: \_\_\_\_\_

**40. Please mark the number** that indicates the **severity** of your period pain **after receiving** the previously taken measure(s):

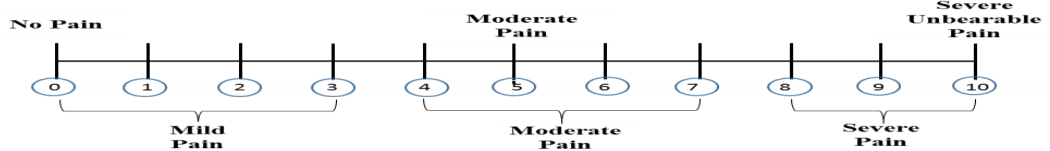

### Medications Used

**41. Do you take a medication** to manage your **painful periods**?

- No                       Yes, prescribed by a **physician**                       Yes, recommended by a **nurse**  
 Yes, prescribed by a **pharmacist**                       Yes, **without a prescription**

↓

**If your answer is No**, Specify the reason(s) for not taking a medication to manage your painful periods **and you will be DONE with the survey, THANK YOU!** (you can choose one or more options):

- Prefer **lifestyle** interventions
- Don't believe that medications are **necessary**
- Don't believe that medications can **help** in **relieving pain**
- Fear of medication's **side effects**
